# Supplementary material for: Targeting CD22 with the monoclonal antibody epratuzumab modulates human B-cell maturation and cytokine production in response to Toll-like receptor 7 (TLR7) and B-cell receptor (BCR) signaling
Source: PubMed Central journal article supplement (PMC5433084; doi:10.1186/s13075-017-1284-2), 2017-05-15

**Fig. S3**

**A**

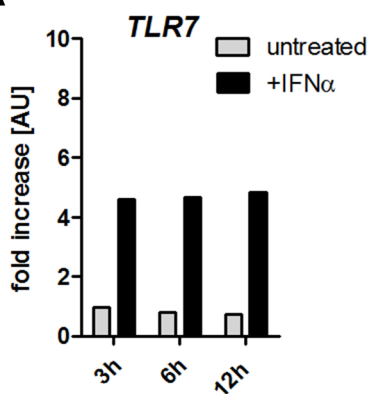

**B**

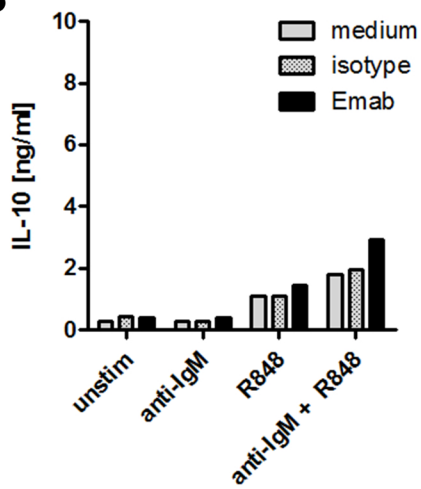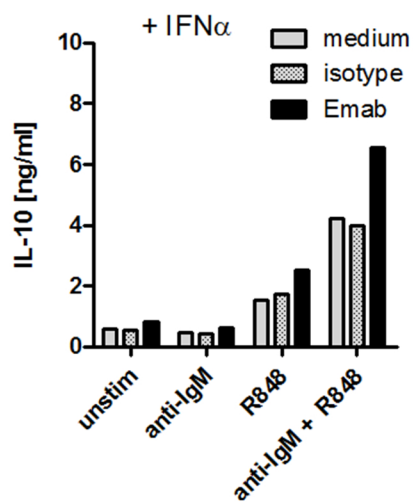

Supplement: 13075_2017_1284_MOESM4_ESM.pdf [file 13075_2017_1284_MOESM4_ESM.pdf]
