# Supplementary material for: Targeting CD22 with the monoclonal antibody epratuzumab modulates human B-cell maturation and cytokine production in response to Toll-like receptor 7 (TLR7) and B-cell receptor (BCR) signaling
Source: Springer Nature journal article supplement (doi:10.1186/s13075-017-1284-2), 2017-05-15
Supplement: MOESM1 [file 12289240]

**Table 1**  
**Primer sequences used for RT-PCR**

| Gene  | Forward                  | Reverse                  |
|-------|--------------------------|--------------------------|
| AICDA | CAATAAGAACGGCTGCCACG     | CAGGAGGTGAACCAGGTGAC     |
| BCL6  | CTGCAGATGGAGCATGTTGT     | TCTTCACGAGGAGGCTTGAT     |
| BCLXL | GAATGACCACCTAGAGCCTTGG   | TGTTCCCATAGAGTTCCACAAAAG |
| CMYC  | AAGAGGGTCAAGTTGGACAGTTGC | TTTCGGTTGTTGCTGATCTGTCT  |
| IL-6  | AGTGAGGAACAAGCCAGAGC     | TCAGGGGTGGTTATTGCATC     |
| IL-10 | GGTGATGCCCAAGCTGA        | TCCCCAGGGAGTTCACA        |
| IRF7  | TGGTCCTGGTGAAGCTGGAA     | GATGTCGTCATAGAGGCTGTTGG  |
| MyD88 | GACCCCTGGTGCAAGTACC      | AGTAGCTTACAACGCATGACAG   |
| PAX5  | TCCCTCATCTTCTCCAAAAGCA   | GGAAATGCGCCGTTTGTAAG     |
| PRDM1 | CGAAATGCCCTTCTACCTG      | GCGTTCAAGTAAGCGTAGGAGT   |
| TBX21 | GGACTGAGATTGCCCCATC      | GCTGTCACCACTGGAAGGAT     |
| TLR7  | CGAACACCACGAACCTCACC     | CCCAGTGAATAGGTACACAGTT   |
| TLR9  | GAAGGGACCTCGAGTGTGAA     | CTGGAGCTCACAGGGTAGGA     |
| 18S   | GAGGGAGCCTGAGAAACGG      | GTCGGGAGTGGGTAATTTGC     |
