# Supplementary material for: Targeting CD22 with the monoclonal antibody epratuzumab modulates human B-cell maturation and cytokine production in response to Toll-like receptor 7 (TLR7) and B-cell receptor (BCR) signaling
Source: Springer Nature journal article supplement (doi:10.1186/s13075-017-1284-2), 2017-05-15

Fig. S2

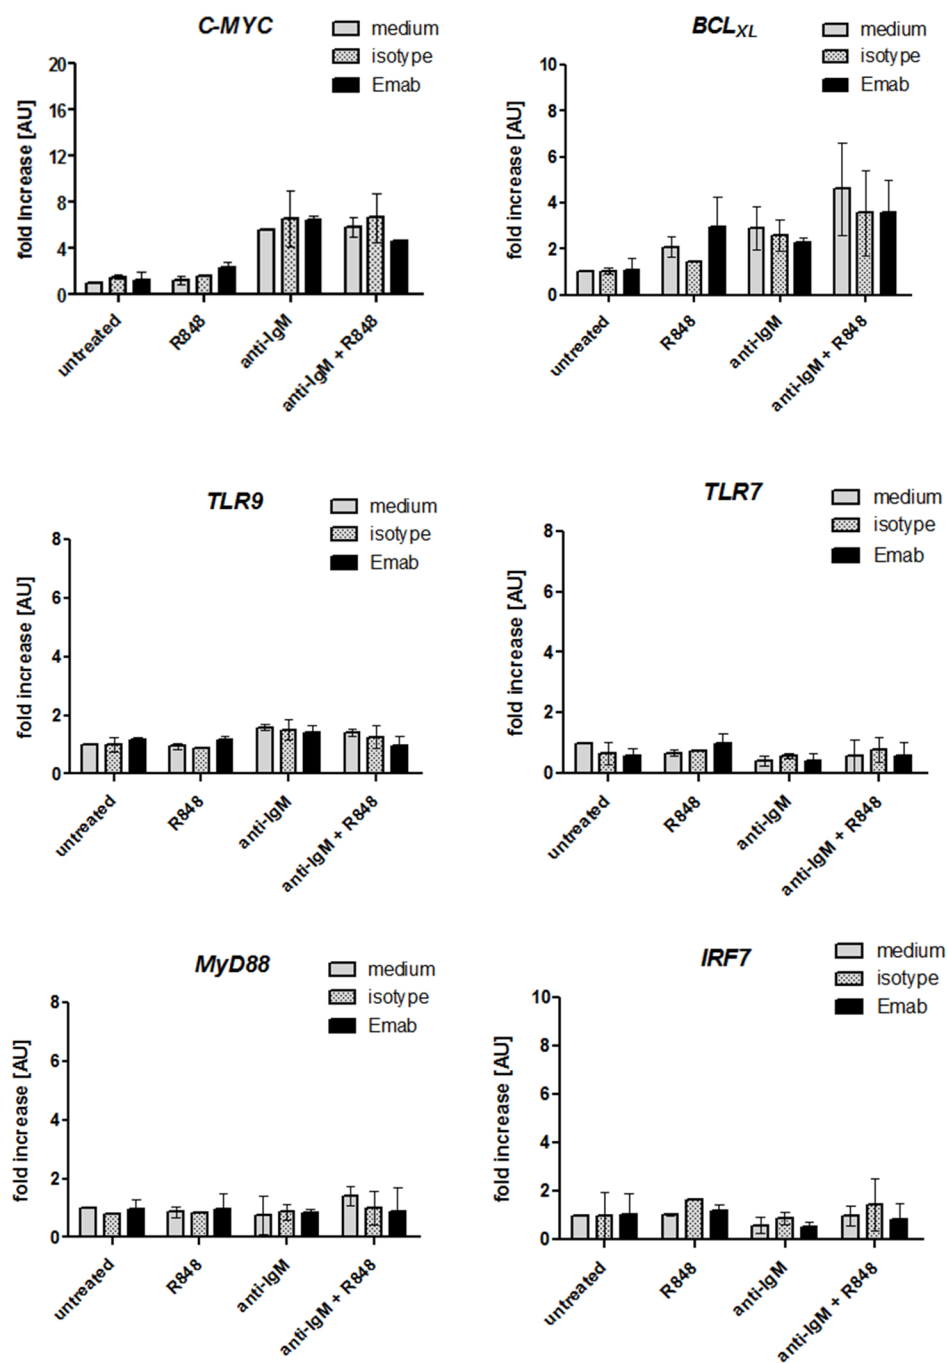

Supplement: MOESM3 [file 12289240]
